# Supplementary material
Source: PubMed Central journal article supplement (PMC7137039)
Supplement: ajtr0012-0999-f12.pdf [file ajtr0012-0999-f12.pdf]

Extracorporeal shock wave therapy on radiation-induced chronic cystitis

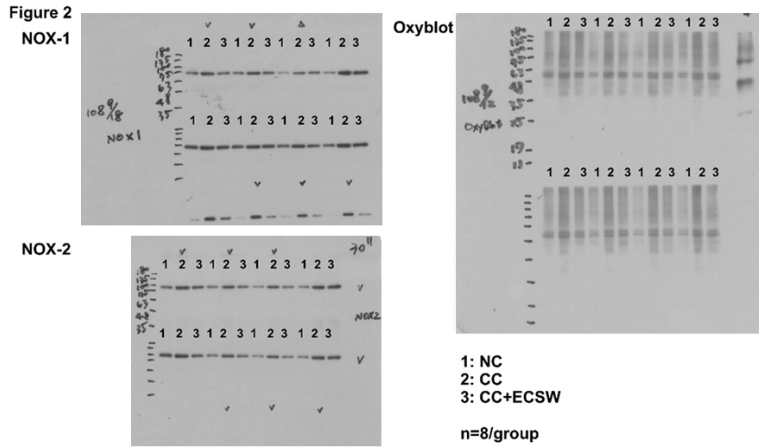

**Supplementary Figure 1.** Illustrating the raw materials of Western blot for identification of the expression of oxidative stress biomarkers.

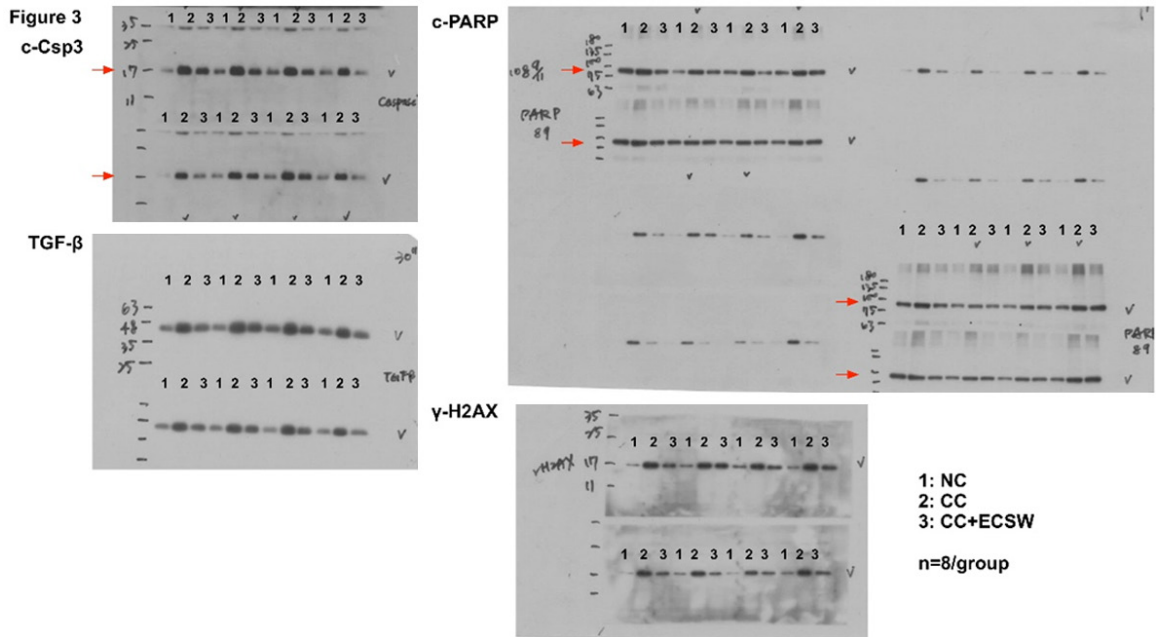

**Supplementary Figure 2.** Illustrating the raw materials of Western blot for identification of the expression of apoptotic, fibrotic and DNA-damaged biomarkers.

Extracorporeal shock wave therapy on radiation-induced chronic cystis

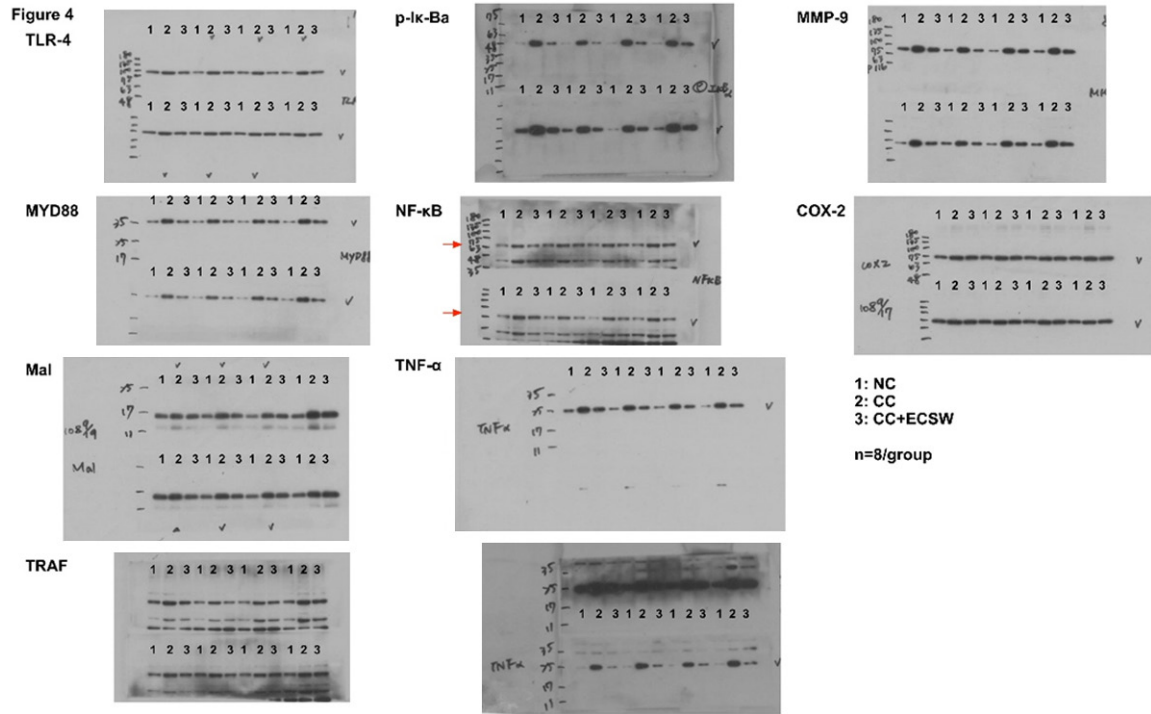

**Supplementary Figure 3.** Illustrating the raw material of Western blot for identification of the expression of inflammatory signaling pathway.
